# Supplementary material for: Phytochemical Composition, Anti-Inflammatory and ER Stress-Reducing Potential of Sambucus ebulus L. Fruit Extract
Source: MDPI journal article supplement (doi:10.3390/plants10112446), 2021-11-12
Supplement: s1 [file s1]

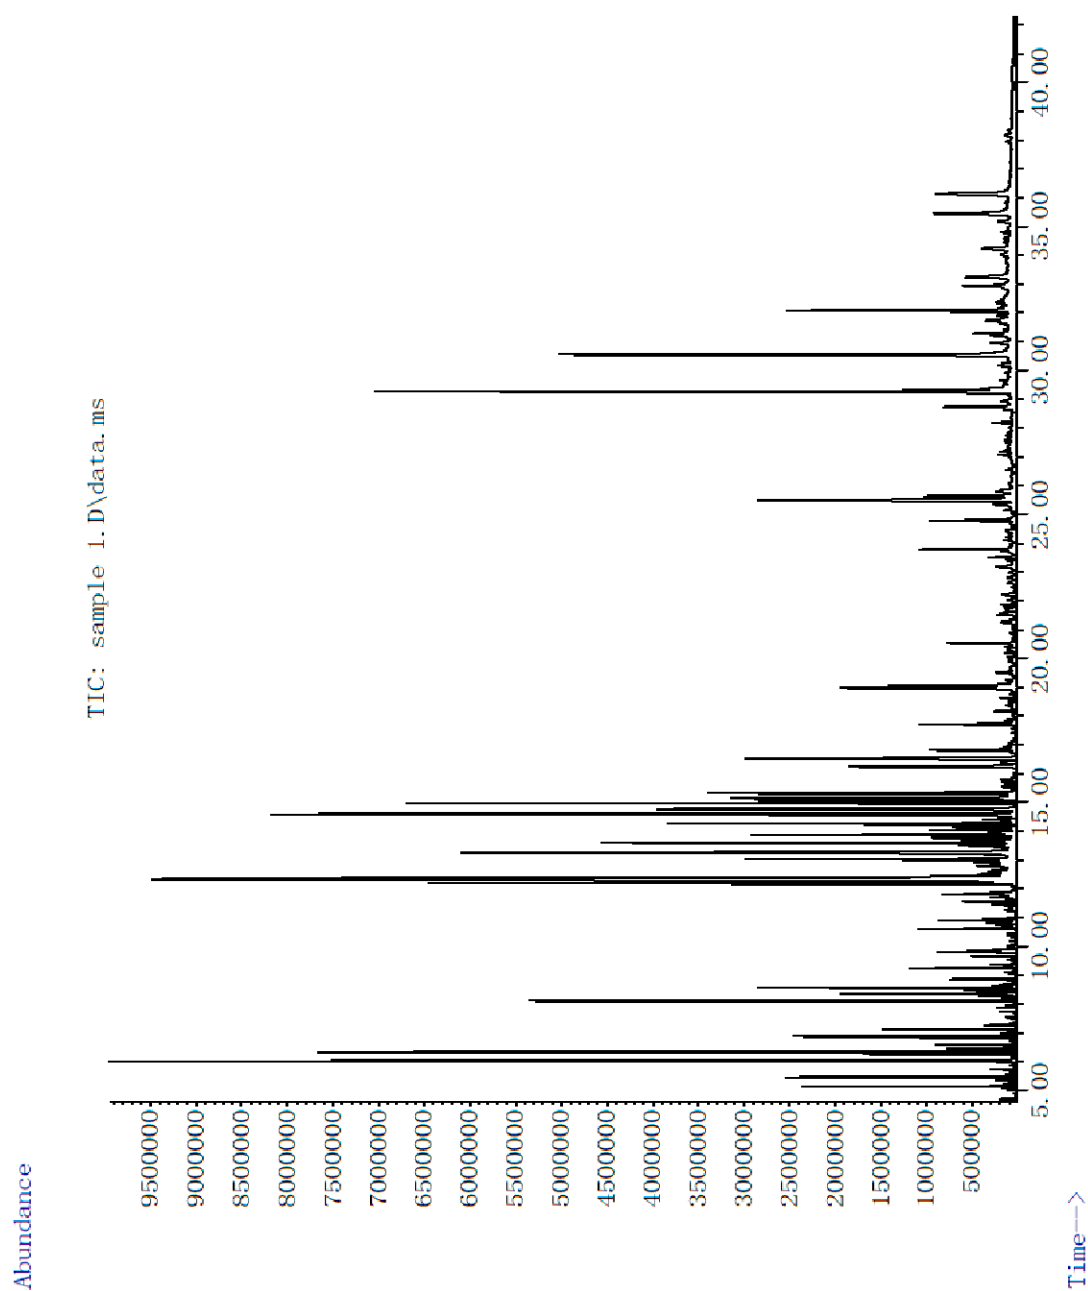

**Figure S1.** Representative chromatogram of analyzed polar compounds (fraction A) presented in Table 1, using GC-MS technique.

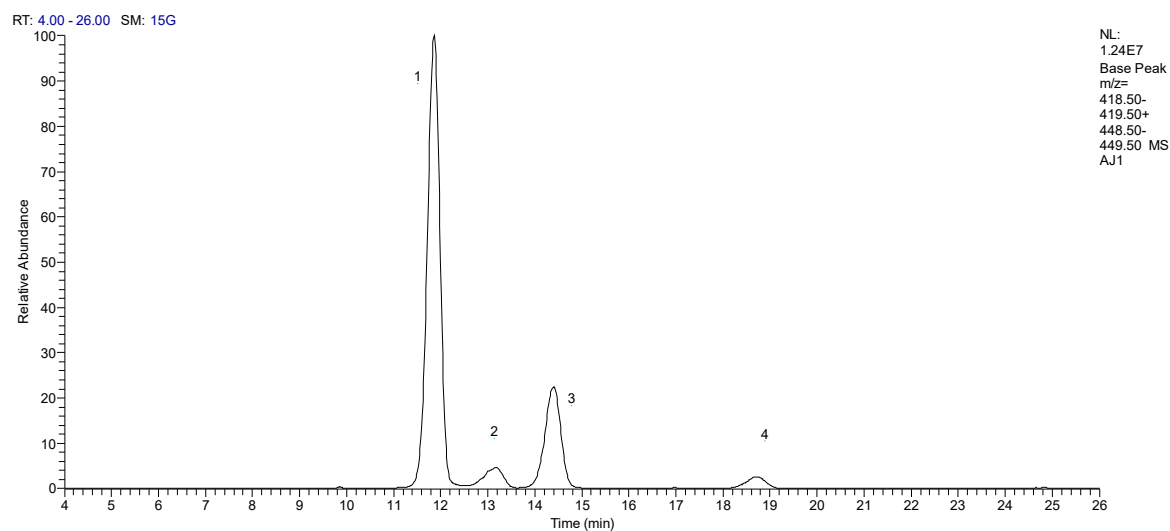

**Figure S2.** Representative LC-PDA-ESI-MS/MS chromatogram of *Sambucus ebulus* L. fruit anthocyanins (1 - Cyanidin-3-O-Galactoside, 2 - Cyanidin-3-O-Glucoside, 3 - Cyanidin-3-O-Arabinoside, 4 - Cyanidin-3-O-Xyloside).

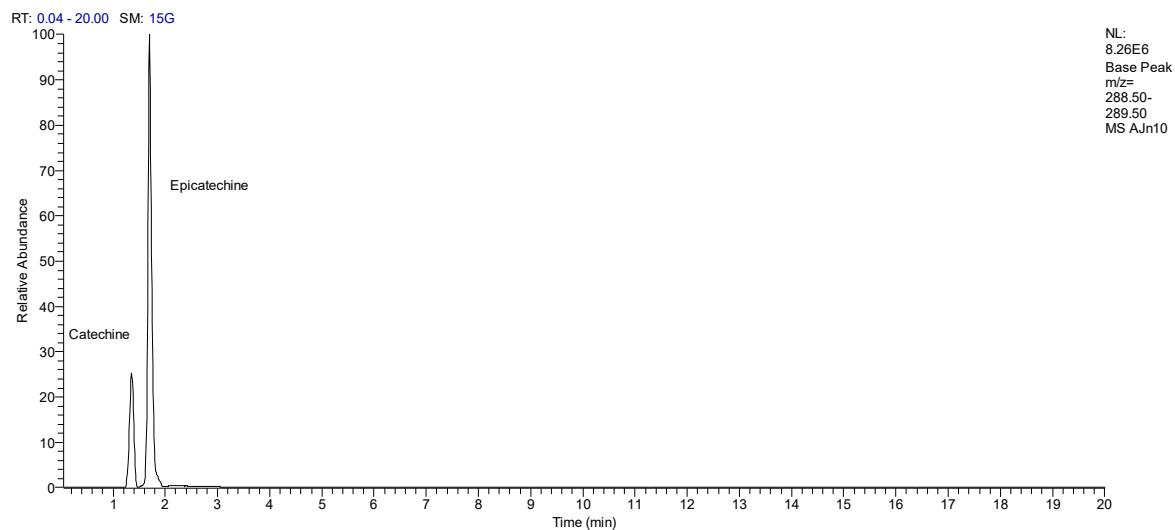

**Figure S3.** Representative LC-PDA-ESI-MS/MS chromatogram of *Sambucus ebulus* L. fruit proanthocyanidin monomers.

RT: 20.50 - 26.10 SM: 15G

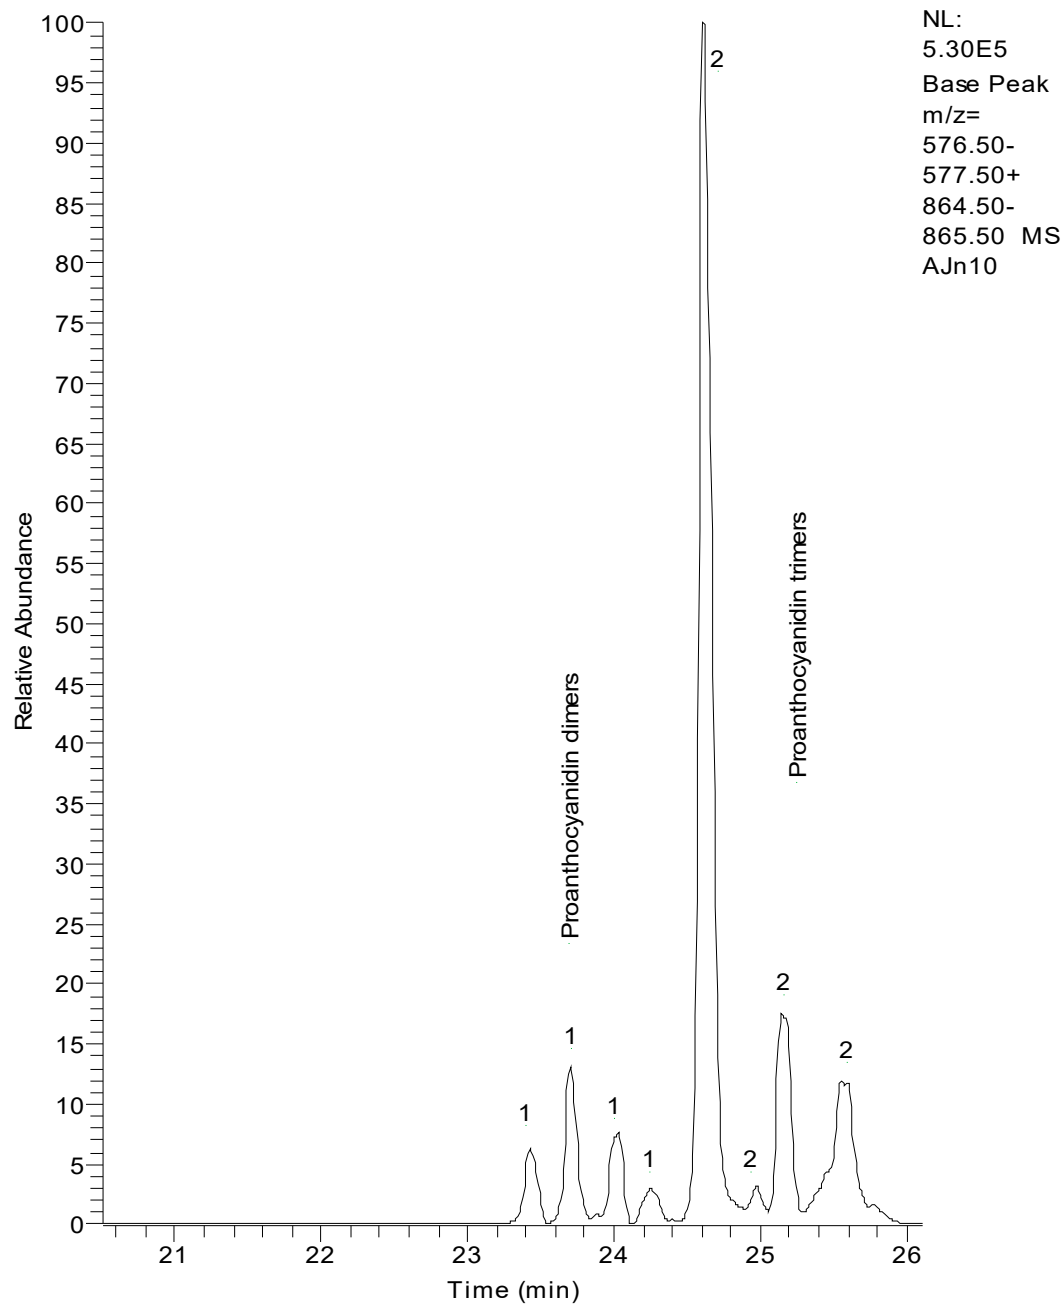

**Figure S4.** Representative LC-PDA-ESI-MS/MS chromatogram of *Sambucus ebulus* L. fruit proanthocyanidin di - and trimers

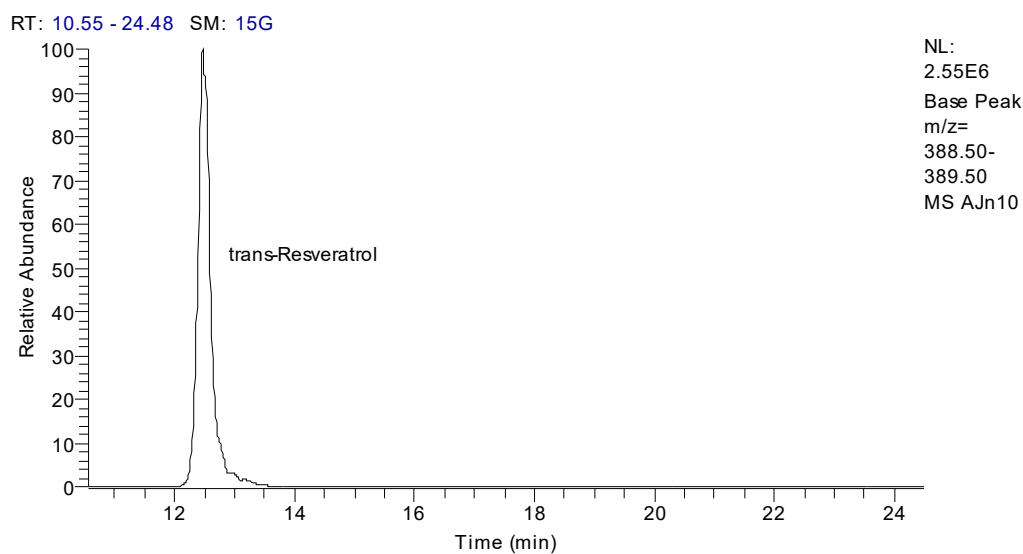

**Figure S5.** Representative LC-PDA-ESI-MS/MS chromatogram of *Sambucus ebulus* L. fruit stilbenes.

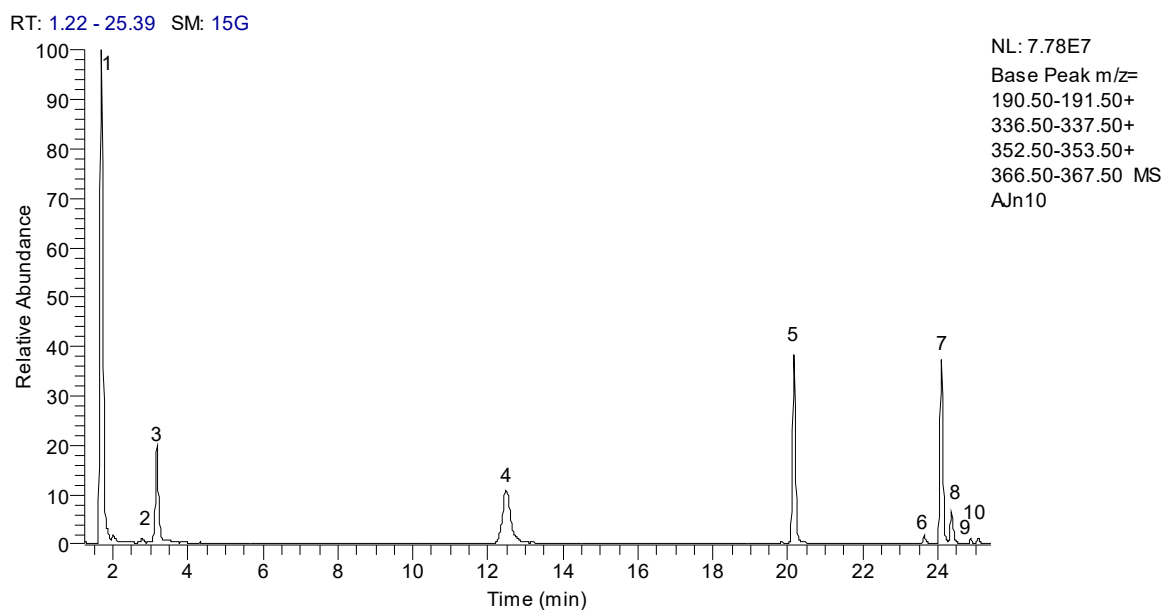

**Figure S6.** Representative LC-PDA-ESI-MS/MS chromatogram of *Sambucus ebulus* L. fruit hydroxycinnamic acids (1 – 3-O-Caffeoylquinic acid, 2 – Caffeic acid-O-galactoside, 3 – Caffeic acid-O-glucoside, 4 – 5-O-Caffeoylquinic acid, 5 – p-Coumaric acid-O-glucoside, 6 – 3-O-p-Coumaroylquinic acid, 7 – Feruloylquinic acid; 8 – 4 -O-p-Coumaroylquinic acid; 9 – Ferulic acid-O-galactoside; 10 – Ferulic acid-O-glucoside);

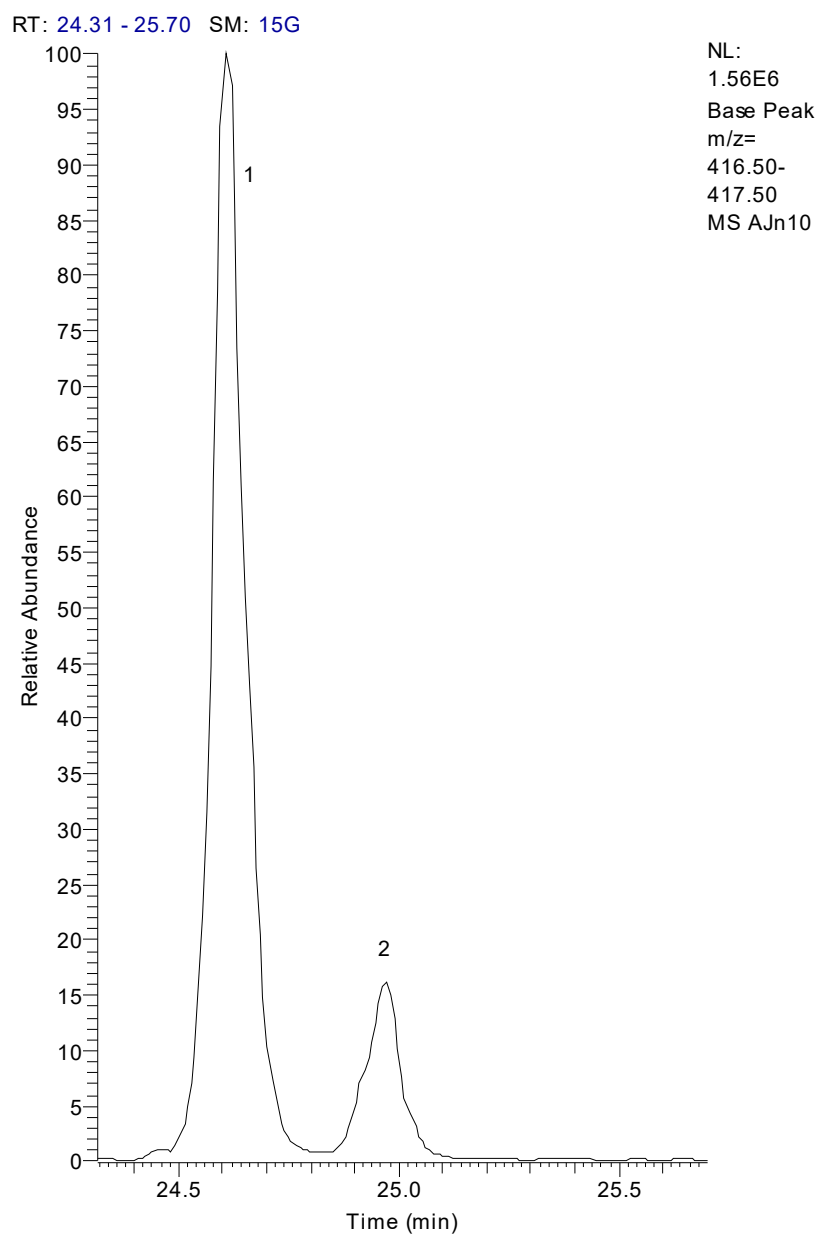

**Figure S7.** Representative LC-PDA-ESI-MS/MS chromatogram of *Sambucus ebulus* L. fruit flavonols (1 - Kaempferol-3-O-arabinoside, 2 - Kaempferol-3-O-xyloside).

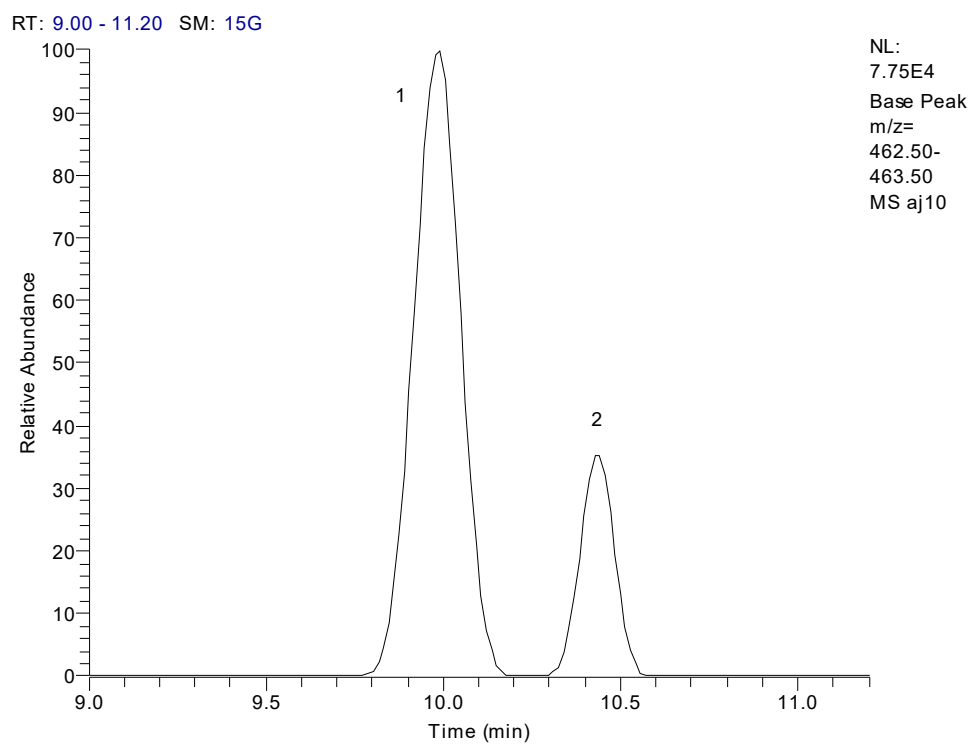

**Figure S8.** Representative LC-PDA-ESI-MS/MS chromatogram of *Sambucus ebulus* L. fruit flavonols (1 - Quercetin-3-O-galactoside, 2 - Quercetin-3-O-glucoside).

RT: 3.53 - 10.02 SM: 15G

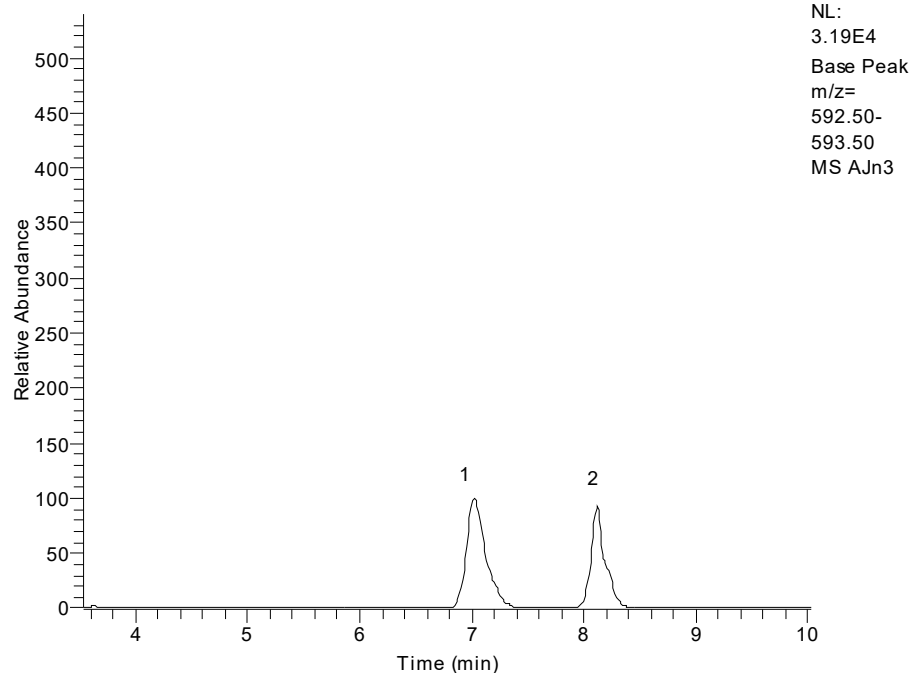

**Figure S9.** Representative LC-PDA-ESI-MS/MS chromatogram of *Sambucus ebulus* L. fruit flavonols (1 - Kaempferol-3-O-rhamnosyl-galactoside, 2 - Kaempferol-3-O-rhamnosyl-glucoside).

RT: 24.21 - 26.45 SM: 15G

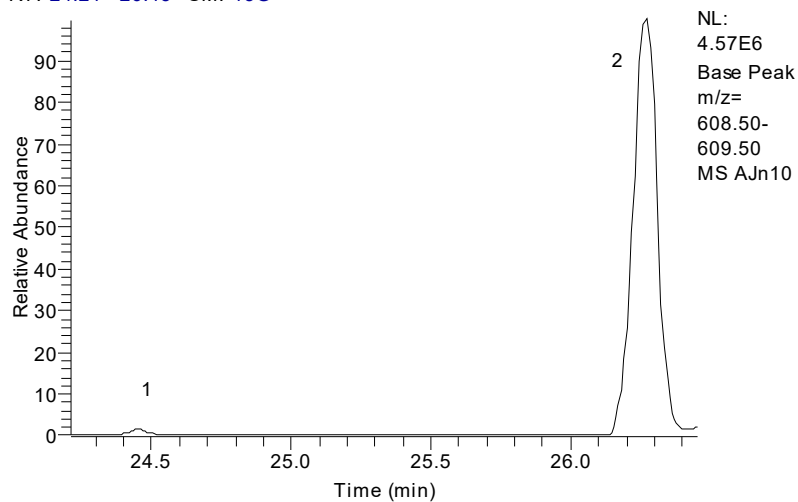

**Figure S10.** Representative LC-PDA-ESI-MS/MS chromatogram of *Sambucus ebulus* L. fruit flavonols (1 - Quercetin-3-O-rhamnosyl-galactoside, 2 - Quercetin-3-O-rhamnosyl-glucoside).

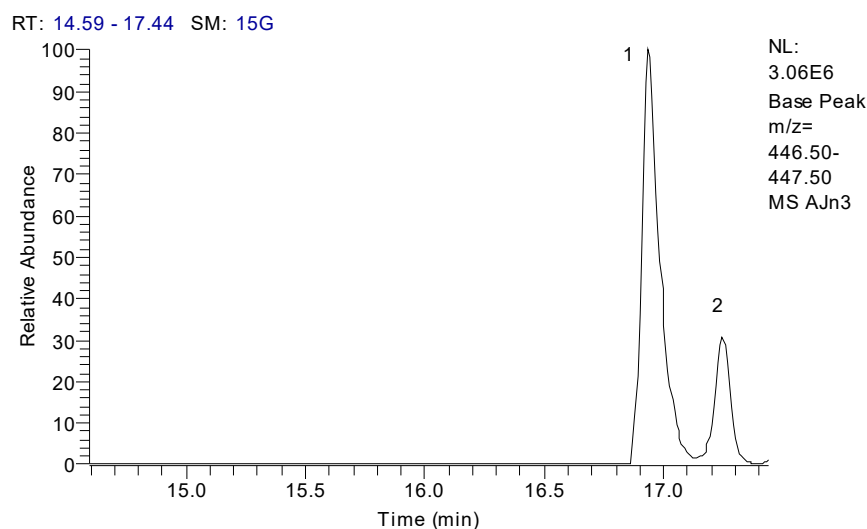

**Figure S11.** Representative LC-PDA-ESI-MS/MS chromatogram of *Sambucus ebulus* L. fruit flavonols (1 - Kaempferol-3-O-galactoside, 2 - Kaempferol-3-O-glucoside).

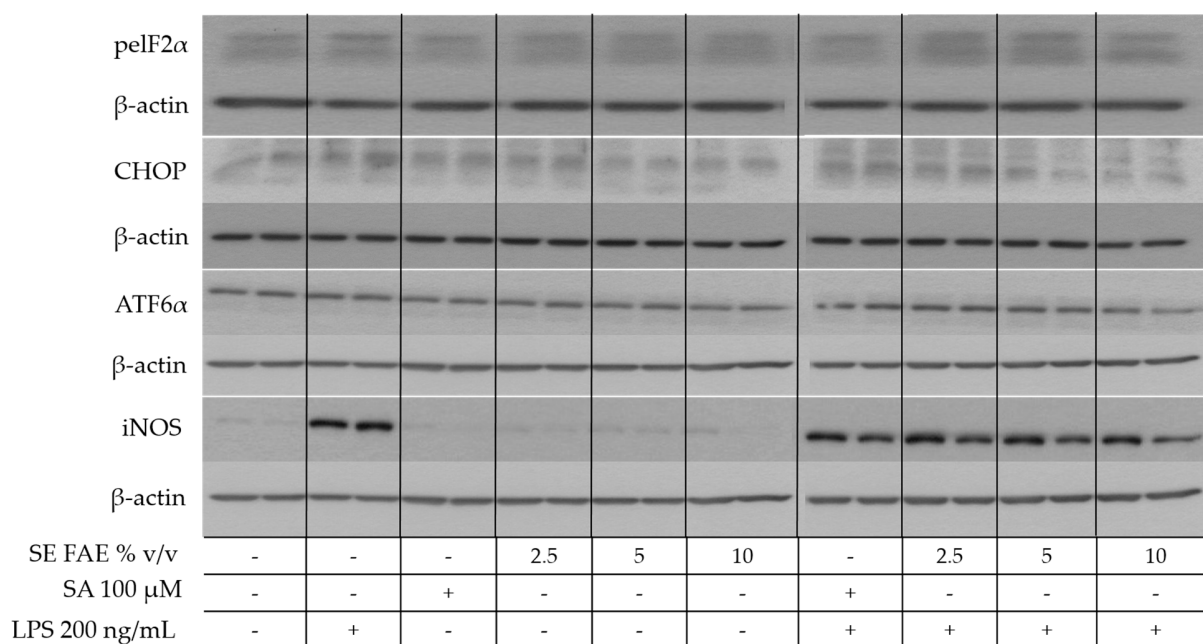

**Figure S12.** Original western blot gels presenting the changes in protein levels of iNOS, peIF2 $\alpha$ , ATF6 $\alpha$  and CHOP in J774A.1 mouse macrophages pre-treated with increasing concentrations (2.5%, 5%, 10% v/v) of SE FAE or with SA for 24 h and subsequently stimulated or not with LPS. Results were obtained using western blot technique. The bands in the respective gels have been spliced from the same original gels. Legend: SE FAE – *Sambucus ebulus* L. fruit aqueous extract; SA – 100  $\mu$ M salicylic acid; LPS – 200 ng/mL lipopolysaccharides.



**Table S1.** Relative Kovats retention index (RI) of analyzed polar compounds (fraction A) presented in Table 1, using GC-MS technique.

| Compound                                | RI     |
|-----------------------------------------|--------|
| <b>Amino acids</b>                      |        |
| L-Valine (2TMS)                         | 1222.5 |
| L-Leucine (2TMS)                        | 1279.9 |
| L-Isoleucine (2TMS)                     | 1298.4 |
| L-Proline (2TMS)                        | 1304.3 |
| L-Threonine (3TMS)                      | 1392.0 |
| L-Phenylalanine (2TMS)                  | 1635.4 |
| L-lysine (3TMS)                         | 1856.8 |
| Glycine (3TMS)                          | 1314.7 |
| Serine (3TMS)                           | 1368.4 |
| L-Aspartic acid (3TMS)                  | 1519.2 |
| L-Asparagine (3TMS)                     | 1609.2 |
| L-Glutamic acid (3TMS)                  | 1626.3 |
| L-Glutamine (3TMS)                      | 1784.5 |
| DL-Ornithine (3TMS)                     | 1759.6 |
| L-Tyrosine (3TMS)                       | 1942.2 |
| <b>Organic acids</b>                    |        |
| Succinic acid (2TMS)                    | 1329.2 |
| Fumaric acid (2TMS)                     | 1357.9 |
| Malic acid (2TMS)                       | 1490.6 |
| Pyroglutamic acid (2TMS)                | 1529.3 |
| 4-Aminobutyric acid (3TMS)              | 1533.6 |
| 2-Hydroxyglutaric acid (3TMS)           | 1576.4 |
| 2-Ketoglutaric acid methoxyamine (2TMS) | 1583.5 |
| Phenylpyruvic acid methoxamine (1TMS)   | 1599.9 |
| 2,3-Dihydroxybutanedioic acid (4TMS)    | 1640.2 |
| Isocitric acid (4TMS)                   | 1832.0 |
| <b>Sugar acids and alcohols</b>         |        |
| Glycerol (3TMS)                         | 1282.6 |
| Digalactosylglycerol (9TMS)             | 3140.3 |
| Glyceric acid (2TMS)                    | 1341.7 |
| Threitol (4TMS)                         | 1502.6 |
| Erythreol (4TMS)                        | 1512.0 |
| Erithreonic acid (4TMS)                 | 1547.4 |
| Threonic acid (4TMS)                    | 1567.2 |
| Xylitol (5TMS)                          | 1699.6 |
| Arabinitol (5TMS)                       | 1714.1 |
| Pentonic acid (5TMS)                    | 1754.5 |
| L-Glycerol-3-phosphate (4TMS)           | 1770.0 |
| Ribonic acid (3TMS)                     | 1789.6 |
| Manitol (6TMS)                          | 1928.6 |

|                                                                             |        |
|-----------------------------------------------------------------------------|--------|
| Sorbitol (6TMS)                                                             | 1933.2 |
| Glucuronic acid methoxyamine (5TMS) isomer                                  | 1937.8 |
| Galactitol (6TMS)                                                           | 1942.0 |
| Galacturonic acid methoxyamine (5TMS) isomer                                | 1945.6 |
| Glucuronic acid methoxyamine (5TMS) isomer                                  | 1951.9 |
| Gluconic acid (6TMS) isomer                                                 | 1961.8 |
| Galacturonic acid methoxyamine (5TMS) isomer                                | 1966.3 |
| Glucuronic acid methoxyamine (5TMS) isomer                                  | 1977.4 |
| Galactonic acid (6TMS)                                                      | 1991.7 |
| Gluconic acid (6TMS) isomer                                                 | 2002.5 |
| Glucaric acid (6TMS)                                                        | 2013.6 |
| Galactaric acid (6TMS)                                                      | 2041.2 |
| Myo-inositol                                                                | 2090.3 |
| Galactosylglycerol (6TMS)                                                   | 2309.6 |
| Sorbitol-6-phosphate (7TMS)                                                 | 2378.4 |
| myo-Inositol-1-phosphate (7TMS) isomer                                      | 2424.2 |
| myo-Inositol-2-phosphate (7TMS) isomer                                      | 2431.5 |
| Gluconic acid-6-phosphate (7TMS)                                            | 2441.2 |
| myo-Inositol-1-phosphate (7TMS) isomer                                      | 2479.4 |
| myo-Inositol-2-phosphate (7TMS) isomer                                      | 2485.3 |
| Maltitol (9TMS); alpha-D-Glc-(1,4)-D-sorbitol (9TMS)                        | 2838.5 |
| Galactinol (9TMS) isomer; alpha-D-Gal-(1,3)-myo-Inositol (9TMS)             | 2950.3 |
| Galactinol (9TMS) isomer; alpha-D-Gal-(1,3)-myo-Inositol (9TMS)             | 2990.2 |
| <b>Saccharides (mono-, di-, and tri-)</b>                                   |        |
| Xylose methoxyamine (4TMS)                                                  | 1661.2 |
| Arabinose methoxyamine (4TMS)                                               | 1673.2 |
| Fructose methoxyamine (5TMS) isomer                                         | 1861.9 |
| Fructose methoxyamine (5TMS) isomer                                         | 1869.8 |
| Sorbose methoxyamine (5TMS) isomer                                          | 1870.6 |
| Sorbose methoxyamine (5TMS) isomer                                          | 1878.3 |
| Galactose methoxyamine (5TMS) isomer                                        | 1885.5 |
| Galactose methoxyamine (5TMS) isomer                                        | 1893.3 |
| Glucose methoxyamine (5TMS) isomer                                          | 1895.2 |
| Glucose methoxyamine (5TMS) isomer                                          | 1910.2 |
| Fructose-6-phosphate methoxyamine (6TMS) isomer                             | 2307.8 |
| Mannose-6-phosphate methoxyamine (6TMS) isomer                              | 2312.4 |
| Galactose-6-phosphate methoxyamine (6TMS) isomer                            | 2315.3 |
| Glucose-6-phosphate methoxyamine (6TMS) isomer                              | 2318.7 |
| Fructose-6-phosphate methoxyamine (6TMS) isomer                             | 2321.2 |
| Galactose-6-phosphate methoxyamine (6TMS) isomer                            | 2347.6 |
| Glucose-6-phosphate methoxyamine (6TMS) isomer                              | 2351.6 |
| Sucrose (8TMS) isomer; alpha-D-Glc-(1,2)-beta-D-Fru isomer                  | 2651.2 |
| Trehalose (8TMS); alpha-D-Glc-(1,1)-alpha-D-Glc isomer                      | 2750.2 |
| Melibiose methoxyamine (8TMS) isomer; alpha-D-Gal-(1,6)-D-Glc (8TMS) isomer | 2870.8 |
| Melibiose methoxyamine (8TMS) isomer; alpha-D-Gal-(1,6)-D-Glc (8TMS) isomer | 2903.4 |

|                                                                                         |        |
|-----------------------------------------------------------------------------------------|--------|
| Sucrose (8TMS) isomer; alpha-D-Glc-(1,2)-beta-D-Fru isomer                              | 3003.3 |
| Trehalose (8TMS); alpha-D-Glc-(1,1)-alpha-D-Glc isomer                                  | 3048.9 |
| Raffinose (11TMS) isomer; alpha-D-Gal-(1,6)-alpha-D-Glc-(1,2)-beta-D-Fru (11TMS) isomer | 3374.4 |
| Raffinose (11TMS) isomer; alpha-D-Gal-(1,6)-alpha-D-Glc-(1,2)-beta-D-Fru (11TMS) isomer | 3393.7 |

**Saturated, unsaturated acids and esters**

|                                              |        |
|----------------------------------------------|--------|
| Hexadecenoic acid (1TMS)                     | 2022.3 |
| 9-(Z)-Hexadecenoic acid (1TMS)               | 2025.9 |
| Heptadecanoic acid (1TMS)                    | 2029.8 |
| Hexadecatrienoic acid (1TMS)                 | 2033.3 |
| Hexadecanoic acid (1TMS)                     | 2046.3 |
| Heptadecanoic acid (1TMS)                    | 2141.4 |
| 9,12-(Z,Z)-Octadecadienoic acid (1TMS)       | 2212.8 |
| 9,12,15-(Z,Z,Z)-Octadecatrienoic acid (1TMS) | 2221.5 |
| Nonadecanoic acid (1TMS)                     | 2233.1 |
| Octadecanoic acid (1TMS)                     | 2243.0 |
| Octadecadienoic acid (1TMS)                  | 2313.5 |
| 1-Monopalmitin trimethylsilyl ether          | 2466.8 |
| Monooctadecanoylglycerol (2TMS)              | 2832.6 |
| beta-Sitosterol (1TMS)                       | 3227.8 |

---

**Table S2.** Precursor ion and fragment ion mass to charge ratios (m/z) of analyzed polyphenols using LC-PDA-ESI-MS/MS technique.

| Compound                          | [M+H] <sup>+</sup><br>(m/z) | MS/MS ions                                                                                         |
|-----------------------------------|-----------------------------|----------------------------------------------------------------------------------------------------|
| <b>Anthocyanins</b>               |                             |                                                                                                    |
| Cyanidin-3-O-Galactoside          | 449                         | 287                                                                                                |
| Cyanidin-3-O-Glucoside            | 449                         | 287                                                                                                |
| Cyanidin-3-O-Arabinoside          | 419                         | 287                                                                                                |
| Cyanidin-3-O-Xyloside             | 419                         | 287                                                                                                |
| <b>Proanthocyanidin monomers</b>  |                             |                                                                                                    |
| Catechin                          | 289                         | 245(100), 205(35), 179(15)                                                                         |
| Epicatechin                       | 289                         | 245(100), 205(30), 179(10)                                                                         |
| <b>Proanthocyanidin dimers</b>    |                             |                                                                                                    |
| EC→EC(1)                          | 577                         | 559(17), 451(37), 425(100), 407(53), 299(8), 289(26), 287(8)                                       |
| EC→EC(2)                          | 577                         | 559(57), 467(20), 451(100), 425(86), 407(59), 289(65)                                              |
| EC→EC(3)                          | 577                         | 559(75), 533(46), 451(29), 439(67), 425(75), 407(20), 393(100), 289(29), 269 (35)                  |
| EC→EC(4)                          | 577                         | 559(100), 533(31), 451(21), 439(34), 425(32), 407(18), 393(35)                                     |
| <b>Proanthocyanidin trimers</b>   |                             |                                                                                                    |
| EC→EC→EC (1)                      | 865                         | 847(40), 779(51), 739(56), 713(57), 695(68), 577(89), 575(100), 449(22), 407(35), 289(27), 287(24) |
| EC→EC→EC (2)                      | 865                         | 847(38), 739(100), 713(58), 695(87), 577(64), 575(35), 451(37), 449(26), 407(30), 287(29)          |
| EC→EC→EC (4)                      | 865                         | 847(18), 749(48), 695(100), 577(68), 575(31), 425(27), 407(30)                                     |
| EC→EC→EC (4)                      | 865                         | 801(41), 789(49), 779(100), 720(70), 695(51), 577(74), 575(55)                                     |
| <b>Stilbenes</b>                  |                             |                                                                                                    |
| trans-Resveratrol-3-O-glucoside   | 389                         | 227 (100)                                                                                          |
| <b>Cyclohexanecarboxylic acid</b> |                             |                                                                                                    |
| Quinic acid                       | 191                         | 173 (5), 11 (60), 109 (5)                                                                          |
| <b>Hydroxycinnamic acids</b>      |                             |                                                                                                    |
| 3-O-Caffeoylquinic acid           | 353                         | 191 (100), 179 (60), 135 (20)                                                                      |
| Caffeic acid-O-galactoside        | 341                         | 179 (100), 135 (10)                                                                                |
| Caffeic acid-O-glucoside          | 341                         | 179 (100), 135 (10)                                                                                |
| 5-O-Caffeoylquinic acid           | 353                         | 191 (100)                                                                                          |

|                             |     |                               |
|-----------------------------|-----|-------------------------------|
| p-Coumaric acid-O-glucoside | 325 | 163 (100), 119 (40)           |
| 3-O-p-Coumaroylquinic acid  | 337 | 191 (10), 163 (100)           |
| Feruloylquinic acid         | 367 | 193 (20), 191 (100), 173 (20) |
| 4-O-p-Coumaroylquinic acid  | 337 | 191 (10), 173 (100), 163 (30) |
| Ferulic acid-O-galactoside  | 355 | 193 (100)                     |
| Ferulic acid-O-glucoside    | 355 | 193 (100)                     |

#### Flavonol glycosides

|                                      |     |                          |
|--------------------------------------|-----|--------------------------|
| Quercetin-3-O-rhamnosyl-galactoside  | 609 | 301 (100), 179, 151      |
| Quercetin-3-O-galactoside            | 463 | 301 (100), 179, 151      |
| Kaempferol-3-O-galactoside           | 447 | 285 (100), 257, 169, 151 |
| Quercetin-3-O-rhamnosyl-glucoside    | 609 | 301 (100), 179, 151      |
| Quercetin-3-O-glucoside              | 463 | 301 (100), 179, 151      |
| Kaempferol-3-O-glucoside             | 447 | 285 (100), 257, 169, 151 |
| Quercetin-3-O-arabinoside            | 433 | 301 (100), 179, 151      |
| Quercetin-3-O-xyloside               | 433 | 301 (100), 179, 151      |
| Kaempferol-3-O-rhamnosyl-galactoside | 593 | 285 (100), 257, 169, 151 |
| Kaempferol-3-O-rhamnosyl-glucoside   | 593 | 285 (100), 257, 169, 151 |
| Kaempferol-3-O-arabinoside           | 417 | 285 (100), 257, 169, 151 |
| Kaempferol-3-O-xyloside              | 417 | 285 (100), 257, 169, 151 |

---
